# Supplementary material
Source: PubMed Central journal article supplement (PMC6774849)
Supplement: NIHMS1534988-supplement-6.pdf [file NIHMS1534988-supplement-6.pdf]

**SUPPLEMENTARY TABLE 1. Gram-staining properties of genus-level taxa**

|                      | <b>Genus-level taxon</b>                                                                                    |
|----------------------|-------------------------------------------------------------------------------------------------------------|
| <b>Gram-negative</b> | k__Bacteria.p__Acidobacteria.c__Holophagae.o__Holophagales.f__Holophagaceae.g__Geothrix                     |
|                      | k__Bacteria.p__Aquificae.c__Aquificae.o__Aquificales.f__Aquificaceae.unclassified                           |
|                      | k__Bacteria.p__Bacteroidetes.c__Bacteroidia.o__Bacteroidales.f__Bacteroidaceae.g__Bacteroides               |
|                      | k__Bacteria.p__Bacteroidetes.c__Bacteroidia.o__Bacteroidales.f__Paraprevotellaceae.g__Prevotella            |
|                      | k__Bacteria.p__Bacteroidetes.c__Bacteroidia.o__Bacteroidales.f__Paraprevotellaceae.unclassified             |
|                      | k__Bacteria.p__Bacteroidetes.c__Bacteroidia.o__Bacteroidales.f__Porphyromonadaceae.g__Dysgonomonas          |
|                      | k__Bacteria.p__Bacteroidetes.c__Bacteroidia.o__Bacteroidales.f__Porphyromonadaceae.g__Paludibacter          |
|                      | k__Bacteria.p__Bacteroidetes.c__Bacteroidia.o__Bacteroidales.f__Porphyromonadaceae.g__Parabacteroides       |
|                      | k__Bacteria.p__Bacteroidetes.c__Bacteroidia.o__Bacteroidales.f__Porphyromonadaceae.g__Porphyromonas         |
|                      | k__Bacteria.p__Bacteroidetes.c__Bacteroidia.o__Bacteroidales.f__Porphyromonadaceae.g__Tannerella            |
|                      | k__Bacteria.p__Bacteroidetes.c__Bacteroidia.o__Bacteroidales.f__Porphyromonadaceae.unclassified             |
|                      | k__Bacteria.p__Bacteroidetes.c__Bacteroidia.o__Bacteroidales.f__Prevotellaceae.g__Prevotella                |
|                      | k__Bacteria.p__Bacteroidetes.c__Bacteroidia.o__Bacteroidales.f__Rikenellaceae.g__Blvii28                    |
|                      | k__Bacteria.p__Bacteroidetes.c__Bacteroidia.o__Bacteroidales.f__Rikenellaceae.unclassified                  |
|                      | k__Bacteria.p__Bacteroidetes.c__Bacteroidia.o__Bacteroidales.unclassified.unclassified                      |
|                      | k__Bacteria.p__Bacteroidetes.c__Cytophagia.o__Cytophagales.f__Cytophagaceae.g__Flectobacillus               |
|                      | k__Bacteria.p__Bacteroidetes.c__Cytophagia.o__Cytophagales.unclassified.unclassified                        |
|                      | k__Bacteria.p__Bacteroidetes.c__Flavobacteriia.o__Flavobacteriales.f__Cryomorphaceae.g__Fluviicola          |
|                      | k__Bacteria.p__Bacteroidetes.c__Flavobacteriia.o__Flavobacteriales.f__Flavobacteriaceae.g__Capnocytophaga   |
|                      | k__Bacteria.p__Bacteroidetes.c__Flavobacteriia.o__Flavobacteriales.f__Flavobacteriaceae.g__Flavobacterium   |
|                      | k__Bacteria.p__Bacteroidetes.c__Flavobacteriia.o__Flavobacteriales.f__Flavobacteriaceae.unclassified        |
|                      | k__Bacteria.p__Bacteroidetes.c__Flavobacteriia.o__Flavobacteriales.f__Weeksellaceae.g__Chryseobacterium     |
|                      | k__Bacteria.p__Bacteroidetes.c__Flavobacteriia.o__Flavobacteriales.f__Weeksellaceae.g__Cloacibacterium      |
|                      | k__Bacteria.p__Bacteroidetes.c__Flavobacteriia.o__Flavobacteriales.f__Weeksellaceae.g__Elizabethkingia      |
|                      | k__Bacteria.p__Bacteroidetes.c__Flavobacteriia.o__Flavobacteriales.f__Weeksellaceae.g__Wautersiella         |
|                      | k__Bacteria.p__Bacteroidetes.c__Flavobacteriia.o__Flavobacteriales.f__Weeksellaceae.unclassified            |
|                      | k__Bacteria.p__Bacteroidetes.c__Flavobacteriia.o__Flavobacteriales.unclassified.unclassified                |
|                      | k__Bacteria.p__Bacteroidetes.c__Saprospirae.o__Saprospirales.f__Chitinophagaceae.g__Chitinophaga            |
|                      | k__Bacteria.p__Bacteroidetes.c__Saprospirae.o__Saprospirales.f__Chitinophagaceae.g__Flaviumibacter          |
|                      | k__Bacteria.p__Bacteroidetes.c__Saprospirae.o__Saprospirales.f__Chitinophagaceae.unclassified               |
|                      | k__Bacteria.p__Bacteroidetes.c__Sphingobacteriia.o__Sphingobacteriales.f__Sphingobacteriaceae.g__Pedobacter |
|                      | k__Bacteria.p__Chloroflexi.c__Anaerolineae.o__SBR1031.f__A4b.unclassified                                   |
|                      | k__Bacteria.p__Chloroflexi.c__Thermomicrobia.unclassified.unclassified.unclassified                         |
|                      | k__Bacteria.p__Cyanobacteria.c__Chloroplast.o__Cryptophyta.unclassified.unclassified                        |

k\_\_Bacteria.p\_\_Elusimicrobia.unclassified.unclassified.unclassified.unclassified  
k\_\_Bacteria.p\_\_Firmicutes.c\_\_Clostridia.o\_\_Clostridiales.f\_\_Lachnospiraceae.g\_\_Catonella  
k\_\_Bacteria.p\_\_Firmicutes.c\_\_Clostridia.o\_\_Clostridiales.f\_\_Lachnospiraceae.g\_\_Roseburia  
k\_\_Bacteria.p\_\_Firmicutes.c\_\_Clostridia.o\_\_Clostridiales.f\_\_Mogibacteriaceae.g\_\_Anaerovorax  
k\_\_Bacteria.p\_\_Firmicutes.c\_\_Clostridia.o\_\_Clostridiales.f\_\_Veillonellaceae.g\_\_Dialister  
k\_\_Bacteria.p\_\_Firmicutes.c\_\_Clostridia.o\_\_Clostridiales.f\_\_Veillonellaceae.g\_\_G07  
k\_\_Bacteria.p\_\_Firmicutes.c\_\_Clostridia.o\_\_Clostridiales.f\_\_Veillonellaceae.g\_\_Megasphaera  
k\_\_Bacteria.p\_\_Firmicutes.c\_\_Clostridia.o\_\_Clostridiales.f\_\_Veillonellaceae.g\_\_Mitsuokella  
k\_\_Bacteria.p\_\_Firmicutes.c\_\_Clostridia.o\_\_Clostridiales.f\_\_Veillonellaceae.g\_\_Schwartzia  
k\_\_Bacteria.p\_\_Firmicutes.c\_\_Clostridia.o\_\_Clostridiales.f\_\_Veillonellaceae.g\_\_Selenomonas  
k\_\_Bacteria.p\_\_Firmicutes.c\_\_Clostridia.o\_\_Clostridiales.f\_\_Veillonellaceae.g\_\_Veillonella  
k\_\_Bacteria.p\_\_Firmicutes.c\_\_Clostridia.o\_\_Clostridiales.f\_\_Veillonellaceae.unclassified  
k\_\_Bacteria.p\_\_Fusobacteria.c\_\_Fusobacteriia.o\_\_Fusobacteriales.f\_\_Fusobacteriaceae.g\_\_Fusobacterium  
k\_\_Bacteria.p\_\_Fusobacteria.c\_\_Fusobacteriia.o\_\_Fusobacteriales.f\_\_Leptotrichiaceae.g\_\_Leptotrichia  
k\_\_Bacteria.p\_\_Fusobacteria.c\_\_Fusobacteriia.o\_\_Fusobacteriales.f\_\_Leptotrichiaceae.g\_\_Sneathia  
k\_\_Bacteria.p\_\_Fusobacteria.c\_\_Fusobacteriia.o\_\_Fusobacteriales.f\_\_Leptotrichiaceae.g\_\_Streptobacillus  
k\_\_Bacteria.p\_\_Fusobacteria.c\_\_Fusobacteriia.o\_\_Fusobacteriales.f\_\_Leptotrichiaceae.unclassified  
k\_\_Bacteria.p\_\_Fusobacteria.c\_\_Fusobacteriia.o\_\_Fusobacteriales.unclassified.unclassified  
k\_\_Bacteria.p\_\_Planctomycetes.c\_\_Planctomycetia.o\_\_Gemmatales.f\_\_Gemmataceae.g\_\_Gemmata  
k\_\_Bacteria.p\_\_Planctomycetes.c\_\_Planctomycetia.o\_\_Planctomycetales.f\_\_Planctomycetaceae.g\_\_Planctomyces  
k\_\_Bacteria.p\_\_Proteobacteria.c\_\_Alphaproteobacteria.o\_\_Caulobacterales.f\_\_Caulobacteraceae.g\_\_Brevundimonas  
k\_\_Bacteria.p\_\_Proteobacteria.c\_\_Alphaproteobacteria.o\_\_Caulobacterales.f\_\_Caulobacteraceae.g\_\_Mycoplana  
k\_\_Bacteria.p\_\_Proteobacteria.c\_\_Alphaproteobacteria.o\_\_Ellin329.unclassified.unclassified  
k\_\_Bacteria.p\_\_Proteobacteria.c\_\_Alphaproteobacteria.o\_\_Rhizobiales.f\_\_Bradyrhizobiaceae.g\_\_Bradyrhizobium  
k\_\_Bacteria.p\_\_Proteobacteria.c\_\_Alphaproteobacteria.o\_\_Rhizobiales.f\_\_Bradyrhizobiaceae.unclassified  
k\_\_Bacteria.p\_\_Proteobacteria.c\_\_Alphaproteobacteria.o\_\_Rhizobiales.f\_\_Hyphomicrobiaceae.g\_\_Devosia  
k\_\_Bacteria.p\_\_Proteobacteria.c\_\_Alphaproteobacteria.o\_\_Rhizobiales.f\_\_Methylobacteriaceae.g\_\_Methylobacterium  
k\_\_Bacteria.p\_\_Proteobacteria.c\_\_Alphaproteobacteria.o\_\_Rhizobiales.f\_\_Methylocystaceae.g\_\_Pleomorphomonas  
k\_\_Bacteria.p\_\_Proteobacteria.c\_\_Alphaproteobacteria.o\_\_Rhizobiales.f\_\_Phyllobacteriaceae.g\_\_Aminobacter  
k\_\_Bacteria.p\_\_Proteobacteria.c\_\_Alphaproteobacteria.o\_\_Rhizobiales.f\_\_Phyllobacteriaceae.unclassified  
k\_\_Bacteria.p\_\_Proteobacteria.c\_\_Alphaproteobacteria.o\_\_Rhizobiales.f\_\_Rhizobiaceae.g\_\_Agrobacterium  
k\_\_Bacteria.p\_\_Proteobacteria.c\_\_Alphaproteobacteria.o\_\_Rhizobiales.f\_\_Rhizobiaceae.g\_\_Kaistia  
k\_\_Bacteria.p\_\_Proteobacteria.c\_\_Alphaproteobacteria.o\_\_Rhizobiales.f\_\_Rhodobiaceae.g\_\_Afifella  
k\_\_Bacteria.p\_\_Proteobacteria.c\_\_Alphaproteobacteria.o\_\_Rhizobiales.f\_\_Xanthobacteraceae.unclassified  
k\_\_Bacteria.p\_\_Proteobacteria.c\_\_Alphaproteobacteria.o\_\_Rhizobiales.unclassified.unclassified  
k\_\_Bacteria.p\_\_Proteobacteria.c\_\_Alphaproteobacteria.o\_\_Rhodobacterales.f\_\_Rhodobacteraceae.g\_\_Paracoccus  
k\_\_Bacteria.p\_\_Proteobacteria.c\_\_Alphaproteobacteria.o\_\_Rhodobacterales.f\_\_Rhodobacteraceae.g\_\_Rhodobacter  
k\_\_Bacteria.p\_\_Proteobacteria.c\_\_Alphaproteobacteria.o\_\_Rhodobacterales.f\_\_Rhodobacteraceae.unclassified

k\_\_Bacteria.p\_\_Proteobacteria.c\_\_Alphaproteobacteria.o\_\_Rhodobacterales.unclassified.unclassified  
k\_\_Bacteria.p\_\_Proteobacteria.c\_\_Alphaproteobacteria.o\_\_Rhodospirillales.f\_\_Acetobacteraceae.g\_\_Roseomonas  
k\_\_Bacteria.p\_\_Proteobacteria.c\_\_Alphaproteobacteria.o\_\_Rhodospirillales.f\_\_Acetobacteraceae.unclassified  
k\_\_Bacteria.p\_\_Proteobacteria.c\_\_Alphaproteobacteria.o\_\_Rhodospirillales.f\_\_Rhodospirillaceae.unclassified  
k\_\_Bacteria.p\_\_Proteobacteria.c\_\_Alphaproteobacteria.o\_\_Rhodospirillales.unclassified.unclassified  
k\_\_Bacteria.p\_\_Proteobacteria.c\_\_Alphaproteobacteria.o\_\_Rickettsiales.f\_\_mitochondria.unclassified  
k\_\_Bacteria.p\_\_Proteobacteria.c\_\_Alphaproteobacteria.o\_\_Sphingomonadales.f\_\_Erythrobacteraceae.g\_\_Erythromicrobium  
k\_\_Bacteria.p\_\_Proteobacteria.c\_\_Alphaproteobacteria.o\_\_Sphingomonadales.f\_\_Sphingomonadaceae.g\_\_Blastomonas  
k\_\_Bacteria.p\_\_Proteobacteria.c\_\_Alphaproteobacteria.o\_\_Sphingomonadales.f\_\_Sphingomonadaceae.g\_\_Kaistobacter  
k\_\_Bacteria.p\_\_Proteobacteria.c\_\_Alphaproteobacteria.o\_\_Sphingomonadales.f\_\_Sphingomonadaceae.g\_\_Novosphingobium  
k\_\_Bacteria.p\_\_Proteobacteria.c\_\_Alphaproteobacteria.o\_\_Sphingomonadales.f\_\_Sphingomonadaceae.g\_\_Sphingobium  
k\_\_Bacteria.p\_\_Proteobacteria.c\_\_Alphaproteobacteria.o\_\_Sphingomonadales.f\_\_Sphingomonadaceae.g\_\_Sphingomonas  
k\_\_Bacteria.p\_\_Proteobacteria.c\_\_Alphaproteobacteria.o\_\_Sphingomonadales.f\_\_Sphingomonadaceae.g\_\_Sphingopyxis  
k\_\_Bacteria.p\_\_Proteobacteria.c\_\_Alphaproteobacteria.o\_\_Sphingomonadales.f\_\_Sphingomonadaceae.unclassified  
k\_\_Bacteria.p\_\_Proteobacteria.c\_\_Alphaproteobacteria.o\_\_Sphingomonadales.unclassified.unclassified  
k\_\_Bacteria.p\_\_Proteobacteria.c\_\_Betaproteobacteria.o\_\_ASSO-13.unclassified.unclassified  
k\_\_Bacteria.p\_\_Proteobacteria.c\_\_Betaproteobacteria.o\_\_Burkholderiales.f\_\_Alcaligenaceae.g\_\_Achromobacter  
k\_\_Bacteria.p\_\_Proteobacteria.c\_\_Betaproteobacteria.o\_\_Burkholderiales.f\_\_Alcaligenaceae.g\_\_Denitrobacter  
k\_\_Bacteria.p\_\_Proteobacteria.c\_\_Betaproteobacteria.o\_\_Burkholderiales.f\_\_Alcaligenaceae.unclassified  
k\_\_Bacteria.p\_\_Proteobacteria.c\_\_Betaproteobacteria.o\_\_Burkholderiales.f\_\_Burkholderiaceae.g\_\_Burkholderia  
k\_\_Bacteria.p\_\_Proteobacteria.c\_\_Betaproteobacteria.o\_\_Burkholderiales.f\_\_Burkholderiaceae.g\_\_Lautropia  
k\_\_Bacteria.p\_\_Proteobacteria.c\_\_Betaproteobacteria.o\_\_Burkholderiales.f\_\_Burkholderiaceae.unclassified  
k\_\_Bacteria.p\_\_Proteobacteria.c\_\_Betaproteobacteria.o\_\_Burkholderiales.f\_\_Comamonadaceae.g\_\_Acidovorax  
k\_\_Bacteria.p\_\_Proteobacteria.c\_\_Betaproteobacteria.o\_\_Burkholderiales.f\_\_Comamonadaceae.g\_\_Alicyclophilus  
k\_\_Bacteria.p\_\_Proteobacteria.c\_\_Betaproteobacteria.o\_\_Burkholderiales.f\_\_Comamonadaceae.g\_\_Aquabacterium  
k\_\_Bacteria.p\_\_Proteobacteria.c\_\_Betaproteobacteria.o\_\_Burkholderiales.f\_\_Comamonadaceae.g\_\_Comamonas  
k\_\_Bacteria.p\_\_Proteobacteria.c\_\_Betaproteobacteria.o\_\_Burkholderiales.f\_\_Comamonadaceae.g\_\_Delftia  
k\_\_Bacteria.p\_\_Proteobacteria.c\_\_Betaproteobacteria.o\_\_Burkholderiales.f\_\_Comamonadaceae.g\_\_Diaphorobacter  
k\_\_Bacteria.p\_\_Proteobacteria.c\_\_Betaproteobacteria.o\_\_Burkholderiales.f\_\_Comamonadaceae.g\_\_Hylemonella  
k\_\_Bacteria.p\_\_Proteobacteria.c\_\_Betaproteobacteria.o\_\_Burkholderiales.f\_\_Comamonadaceae.g\_\_Limnobacter  
k\_\_Bacteria.p\_\_Proteobacteria.c\_\_Betaproteobacteria.o\_\_Burkholderiales.f\_\_Comamonadaceae.g\_\_Limnohabitans  
k\_\_Bacteria.p\_\_Proteobacteria.c\_\_Betaproteobacteria.o\_\_Burkholderiales.f\_\_Comamonadaceae.g\_\_Methylibium  
k\_\_Bacteria.p\_\_Proteobacteria.c\_\_Betaproteobacteria.o\_\_Burkholderiales.f\_\_Comamonadaceae.g\_\_Paucibacter  
k\_\_Bacteria.p\_\_Proteobacteria.c\_\_Betaproteobacteria.o\_\_Burkholderiales.f\_\_Comamonadaceae.g\_\_Polaromonas  
k\_\_Bacteria.p\_\_Proteobacteria.c\_\_Betaproteobacteria.o\_\_Burkholderiales.f\_\_Comamonadaceae.g\_\_Rhodiferax  
k\_\_Bacteria.p\_\_Proteobacteria.c\_\_Betaproteobacteria.o\_\_Burkholderiales.f\_\_Comamonadaceae.g\_\_Variovorax  
k\_\_Bacteria.p\_\_Proteobacteria.c\_\_Betaproteobacteria.o\_\_Burkholderiales.f\_\_Comamonadaceae.unclassified  
k\_\_Bacteria.p\_\_Proteobacteria.c\_\_Betaproteobacteria.o\_\_Burkholderiales.f\_\_Oxalobacteraceae.g\_\_Cupriavidus

k\_\_Bacteria.p\_\_Proteobacteria.c\_\_Betaproteobacteria.o\_\_Burkholderiales.f\_\_Oxalobacteraceae.g\_\_Janthinobacterium  
k\_\_Bacteria.p\_\_Proteobacteria.c\_\_Betaproteobacteria.o\_\_Burkholderiales.f\_\_Oxalobacteraceae.g\_\_Polynucleobacter  
k\_\_Bacteria.p\_\_Proteobacteria.c\_\_Betaproteobacteria.o\_\_Burkholderiales.f\_\_Oxalobacteraceae.g\_\_Ralstonia  
k\_\_Bacteria.p\_\_Proteobacteria.c\_\_Betaproteobacteria.o\_\_Burkholderiales.f\_\_Oxalobacteraceae.unclassified  
k\_\_Bacteria.p\_\_Proteobacteria.c\_\_Betaproteobacteria.o\_\_Methylophilales.f\_\_Methylophilaceae.g\_\_Methylobacillus  
k\_\_Bacteria.p\_\_Proteobacteria.c\_\_Betaproteobacteria.o\_\_Methylophilales.f\_\_Methylophilaceae.g\_\_Methylothena  
k\_\_Bacteria.p\_\_Proteobacteria.c\_\_Betaproteobacteria.o\_\_Methylophilales.f\_\_Methylophilaceae.unclassified  
k\_\_Bacteria.p\_\_Proteobacteria.c\_\_Betaproteobacteria.o\_\_Neisseriales.f\_\_Neisseriaceae.g\_\_Eikenella  
k\_\_Bacteria.p\_\_Proteobacteria.c\_\_Betaproteobacteria.o\_\_Neisseriales.f\_\_Neisseriaceae.g\_\_Kingella  
k\_\_Bacteria.p\_\_Proteobacteria.c\_\_Betaproteobacteria.o\_\_Neisseriales.f\_\_Neisseriaceae.g\_\_Neisseria  
k\_\_Bacteria.p\_\_Proteobacteria.c\_\_Betaproteobacteria.o\_\_Neisseriales.f\_\_Neisseriaceae.unclassified  
k\_\_Bacteria.p\_\_Proteobacteria.c\_\_Betaproteobacteria.o\_\_Rhodocyclales.f\_\_Rhodocyclaceae.g\_\_Azoarcus  
k\_\_Bacteria.p\_\_Proteobacteria.c\_\_Betaproteobacteria.o\_\_Rhodocyclales.f\_\_Rhodocyclaceae.g\_\_Azospira  
k\_\_Bacteria.p\_\_Proteobacteria.c\_\_Betaproteobacteria.o\_\_Rhodocyclales.f\_\_Rhodocyclaceae.g\_\_Dechloromonas  
k\_\_Bacteria.p\_\_Proteobacteria.c\_\_Betaproteobacteria.o\_\_Rhodocyclales.f\_\_Rhodocyclaceae.g\_\_Hydrogenophilus  
k\_\_Bacteria.p\_\_Proteobacteria.c\_\_Betaproteobacteria.o\_\_Rhodocyclales.f\_\_Rhodocyclaceae.g\_\_KD1-23  
k\_\_Bacteria.p\_\_Proteobacteria.c\_\_Betaproteobacteria.o\_\_Rhodocyclales.f\_\_Rhodocyclaceae.g\_\_Methyloversatilis  
k\_\_Bacteria.p\_\_Proteobacteria.c\_\_Betaproteobacteria.o\_\_Rhodocyclales.f\_\_Rhodocyclaceae.g\_\_Z-35  
k\_\_Bacteria.p\_\_Proteobacteria.c\_\_Betaproteobacteria.o\_\_Rhodocyclales.f\_\_Rhodocyclaceae.g\_\_Zoogloea  
k\_\_Bacteria.p\_\_Proteobacteria.c\_\_Betaproteobacteria.o\_\_Rhodocyclales.f\_\_Rhodocyclaceae.unclassified  
k\_\_Bacteria.p\_\_Proteobacteria.c\_\_Deltaproteobacteria.o\_\_Bdellovibrionales.f\_\_Bacteriovoracaceae.unclassified  
k\_\_Bacteria.p\_\_Proteobacteria.c\_\_Deltaproteobacteria.o\_\_Desulfovibrionales.f\_\_Desulfovibrionaceae.g\_\_Desulfovibrio  
k\_\_Bacteria.p\_\_Proteobacteria.c\_\_Deltaproteobacteria.o\_\_MIZ46.unclassified.unclassified  
k\_\_Bacteria.p\_\_Proteobacteria.c\_\_Deltaproteobacteria.o\_\_Myxococcales.unclassified.unclassified  
k\_\_Bacteria.p\_\_Proteobacteria.c\_\_Deltaproteobacteria.unclassified.unclassified.unclassified  
k\_\_Bacteria.p\_\_Proteobacteria.c\_\_Epsilonproteobacteria.o\_\_Campylobacteriales.f\_\_Campylobacteraceae.g\_\_Arcobacter  
k\_\_Bacteria.p\_\_Proteobacteria.c\_\_Epsilonproteobacteria.o\_\_Campylobacteriales.f\_\_Campylobacteraceae.g\_\_Campylobacter  
k\_\_Bacteria.p\_\_Proteobacteria.c\_\_Epsilonproteobacteria.o\_\_Campylobacteriales.f\_\_Campylobacteraceae.g\_\_Sulfurospirillum  
k\_\_Bacteria.p\_\_Proteobacteria.c\_\_Epsilonproteobacteria.o\_\_Campylobacteriales.f\_\_Helicobacteraceae.g\_\_Helicobacter  
k\_\_Bacteria.p\_\_Proteobacteria.c\_\_Epsilonproteobacteria.o\_\_Campylobacteriales.f\_\_Helicobacteraceae.g\_\_Sulfuricurvum  
k\_\_Bacteria.p\_\_Proteobacteria.c\_\_Epsilonproteobacteria.o\_\_Campylobacteriales.f\_\_Helicobacteraceae.unclassified  
k\_\_Bacteria.p\_\_Proteobacteria.c\_\_Gammaproteobacteria.o\_\_Aeromonadales.f\_\_Aeromonadaceae.g\_\_Tolomonas  
k\_\_Bacteria.p\_\_Proteobacteria.c\_\_Gammaproteobacteria.o\_\_Aeromonadales.f\_\_Aeromonadaceae.unclassified  
k\_\_Bacteria.p\_\_Proteobacteria.c\_\_Gammaproteobacteria.o\_\_Alteromonadales.f\_\_Chromatiaceae.g\_\_Rheinheimera  
k\_\_Bacteria.p\_\_Proteobacteria.c\_\_Gammaproteobacteria.o\_\_Alteromonadales.f\_\_Psychromonadaceae.g\_\_Psychromonas  
k\_\_Bacteria.p\_\_Proteobacteria.c\_\_Gammaproteobacteria.o\_\_Alteromonadales.f\_\_Shewanellaceae.g\_\_Shewanella  
k\_\_Bacteria.p\_\_Proteobacteria.c\_\_Gammaproteobacteria.o\_\_Cardiobacteriales.f\_\_Cardiobacteriaceae.g\_\_Cardiobacterium  
k\_\_Bacteria.p\_\_Proteobacteria.c\_\_Gammaproteobacteria.o\_\_Enterobacteriales.f\_\_Enterobacteriaceae.g\_\_Citrobacter

k\_\_Bacteria.p\_\_Proteobacteria.c\_\_Gammaproteobacteria.o\_\_Enterobacteriales.f\_\_Enterobacteriaceae.g\_\_Erwinia  
 k\_\_Bacteria.p\_\_Proteobacteria.c\_\_Gammaproteobacteria.o\_\_Enterobacteriales.f\_\_Enterobacteriaceae.g\_\_Klebsiella  
 k\_\_Bacteria.p\_\_Proteobacteria.c\_\_Gammaproteobacteria.o\_\_Enterobacteriales.f\_\_Enterobacteriaceae.g\_\_Salmonella  
 k\_\_Bacteria.p\_\_Proteobacteria.c\_\_Gammaproteobacteria.o\_\_Enterobacteriales.f\_\_Enterobacteriaceae.g\_\_Serratia  
 k\_\_Bacteria.p\_\_Proteobacteria.c\_\_Gammaproteobacteria.o\_\_Enterobacteriales.f\_\_Enterobacteriaceae.g\_\_Trabulsiella  
 k\_\_Bacteria.p\_\_Proteobacteria.c\_\_Gammaproteobacteria.o\_\_Enterobacteriales.f\_\_Enterobacteriaceae.g\_\_Yersinia  
 k\_\_Bacteria.p\_\_Proteobacteria.c\_\_Gammaproteobacteria.o\_\_Enterobacteriales.f\_\_Enterobacteriaceae.unclassified  
 k\_\_Bacteria.p\_\_Proteobacteria.c\_\_Gammaproteobacteria.o\_\_Legionellales.f\_\_Legionellaceae.g\_\_Legionella  
 k\_\_Bacteria.p\_\_Proteobacteria.c\_\_Gammaproteobacteria.o\_\_Legionellales.f\_\_Legionellaceae.unclassified  
 k\_\_Bacteria.p\_\_Proteobacteria.c\_\_Gammaproteobacteria.o\_\_Oceanospirillales.f\_\_Oceanospirillaceae.g\_\_Marinomonas  
 k\_\_Bacteria.p\_\_Proteobacteria.c\_\_Gammaproteobacteria.o\_\_Pasteurellales.f\_\_Pasteurellaceae.g\_\_Actinobacillus  
 k\_\_Bacteria.p\_\_Proteobacteria.c\_\_Gammaproteobacteria.o\_\_Pasteurellales.f\_\_Pasteurellaceae.g\_\_Aggregatibacter  
 k\_\_Bacteria.p\_\_Proteobacteria.c\_\_Gammaproteobacteria.o\_\_Pasteurellales.f\_\_Pasteurellaceae.g\_\_Haemophilus  
 k\_\_Bacteria.p\_\_Proteobacteria.c\_\_Gammaproteobacteria.o\_\_Pasteurellales.f\_\_Pasteurellaceae.unclassified  
 k\_\_Bacteria.p\_\_Proteobacteria.c\_\_Gammaproteobacteria.o\_\_Pseudomonadales.f\_\_Moraxellaceae.g\_\_Acinetobacter  
 k\_\_Bacteria.p\_\_Proteobacteria.c\_\_Gammaproteobacteria.o\_\_Pseudomonadales.f\_\_Moraxellaceae.g\_\_Alkanindiges  
 k\_\_Bacteria.p\_\_Proteobacteria.c\_\_Gammaproteobacteria.o\_\_Pseudomonadales.f\_\_Moraxellaceae.g\_\_Enhydrobacter  
 k\_\_Bacteria.p\_\_Proteobacteria.c\_\_Gammaproteobacteria.o\_\_Pseudomonadales.f\_\_Moraxellaceae.unclassified  
 k\_\_Bacteria.p\_\_Proteobacteria.c\_\_Gammaproteobacteria.o\_\_Pseudomonadales.f\_\_Pseudomonadaceae.g\_\_Azorhizophilus  
 k\_\_Bacteria.p\_\_Proteobacteria.c\_\_Gammaproteobacteria.o\_\_Pseudomonadales.f\_\_Pseudomonadaceae.g\_\_Pseudomonas  
 k\_\_Bacteria.p\_\_Proteobacteria.c\_\_Gammaproteobacteria.o\_\_Pseudomonadales.f\_\_Pseudomonadaceae.unclassified  
 k\_\_Bacteria.p\_\_Proteobacteria.c\_\_Gammaproteobacteria.o\_\_Vibrionales.f\_\_Vibrionaceae.g\_\_Photobacterium  
 k\_\_Bacteria.p\_\_Proteobacteria.c\_\_Gammaproteobacteria.o\_\_Vibrionales.f\_\_Vibrionaceae.g\_\_Vibrio  
 k\_\_Bacteria.p\_\_Proteobacteria.c\_\_Gammaproteobacteria.o\_\_Xanthomonadales.f\_\_Sinobacteraceae.unclassified  
 k\_\_Bacteria.p\_\_Proteobacteria.c\_\_Gammaproteobacteria.o\_\_Xanthomonadales.f\_\_Xanthomonadaceae.g\_\_Pseudoxanthomonas  
 k\_\_Bacteria.p\_\_Proteobacteria.c\_\_Gammaproteobacteria.o\_\_Xanthomonadales.f\_\_Xanthomonadaceae.g\_\_Stenotrophomonas  
 k\_\_Bacteria.p\_\_Proteobacteria.c\_\_Gammaproteobacteria.o\_\_Xanthomonadales.f\_\_Xanthomonadaceae.unclassified  
 k\_\_Bacteria.p\_\_Spirochaetes.c\_\_Spirochaetes.o\_\_Spirochaetales.f\_\_Spirochaetaceae.g\_\_Spirochaeta  
 k\_\_Bacteria.p\_\_Spirochaetes.c\_\_Spirochaetes.o\_\_Spirochaetales.f\_\_Spirochaetaceae.g\_\_Treponema  
 k\_\_Bacteria.p\_\_Synergistetes.c\_\_Synergistia.o\_\_Synergistales.unclassified.unclassified  
 k\_\_Bacteria.p\_\_Verrucomicrobia.c\_\_Opitutae.o\_\_Opitutales.f\_\_Opitutaceae.g\_\_Opitutus

**Gram-positive**

k\_\_Bacteria.p\_\_Verrucomicrobia.c\_\_Verrucomicrobiae.o\_\_Verrucomicrobiales.f\_\_Verrucomicrobiaceae.g\_\_Akkermansia  
 k\_\_Bacteria.p\_\_Actinobacteria.c\_\_Acidimicrobiia.o\_\_Acidimicrobiales.unclassified.unclassified  
 k\_\_Bacteria.p\_\_Actinobacteria.c\_\_Actinobacteria.o\_\_Actinomycetales.f\_\_ACK-M1.unclassified  
 k\_\_Bacteria.p\_\_Actinobacteria.c\_\_Actinobacteria.o\_\_Actinomycetales.f\_\_Actinomycetaceae.g\_\_Actinomyces  
 k\_\_Bacteria.p\_\_Actinobacteria.c\_\_Actinobacteria.o\_\_Actinomycetales.f\_\_Actinomycetaceae.unclassified  
 k\_\_Bacteria.p\_\_Actinobacteria.c\_\_Actinobacteria.o\_\_Bifidobacteriales.f\_\_Bifidobacteriaceae.g\_\_Alloscardovia

k\_\_Bacteria.p\_\_Actinobacteria.c\_\_Actinobacteria.o\_\_Bifidobacteriales.f\_\_Bifidobacteriaceae.g\_\_Scardovia  
k\_\_Bacteria.p\_\_Actinobacteria.c\_\_Actinobacteria.o\_\_Actinomycetales.f\_\_Bogoriellaceae.g\_\_Georgenia  
k\_\_Bacteria.p\_\_Actinobacteria.c\_\_Actinobacteria.o\_\_Actinomycetales.f\_\_Brevibacteriaceae.g\_\_Brevibacterium  
k\_\_Bacteria.p\_\_Actinobacteria.c\_\_Actinobacteria.o\_\_Actinomycetales.f\_\_Cellulomonadaceae.g\_\_Cellulomonas  
k\_\_Bacteria.p\_\_Actinobacteria.c\_\_Actinobacteria.o\_\_Actinomycetales.f\_\_Corynebacteriaceae.g\_\_Corynebacterium  
k\_\_Bacteria.p\_\_Actinobacteria.c\_\_Actinobacteria.o\_\_Actinomycetales.f\_\_Dermacoccaceae.g\_\_Dermacoccus  
k\_\_Bacteria.p\_\_Actinobacteria.c\_\_Actinobacteria.o\_\_Actinomycetales.f\_\_Dietziaceae.g\_\_Dietzia  
k\_\_Bacteria.p\_\_Actinobacteria.c\_\_Actinobacteria.o\_\_Actinomycetales.f\_\_Geodermatophilaceae.g\_\_Modestobacter  
k\_\_Bacteria.p\_\_Actinobacteria.c\_\_Actinobacteria.o\_\_Actinomycetales.f\_\_Geodermatophilaceae.unclassified  
k\_\_Bacteria.p\_\_Actinobacteria.c\_\_Actinobacteria.o\_\_Actinomycetales.f\_\_Intrasporangiaceae.g\_\_Knoellia  
k\_\_Bacteria.p\_\_Actinobacteria.c\_\_Actinobacteria.o\_\_Actinomycetales.f\_\_Intrasporangiaceae.g\_\_Phycococcus  
k\_\_Bacteria.p\_\_Actinobacteria.c\_\_Actinobacteria.o\_\_Actinomycetales.f\_\_Intrasporangiaceae.unclassified  
k\_\_Bacteria.p\_\_Actinobacteria.c\_\_Actinobacteria.o\_\_Actinomycetales.f\_\_Microbacteriaceae.g\_\_Agrococcus  
k\_\_Bacteria.p\_\_Actinobacteria.c\_\_Actinobacteria.o\_\_Actinomycetales.f\_\_Microbacteriaceae.g\_\_Frigoribacterium  
k\_\_Bacteria.p\_\_Actinobacteria.c\_\_Actinobacteria.o\_\_Actinomycetales.f\_\_Microbacteriaceae.g\_\_Leucobacter  
k\_\_Bacteria.p\_\_Actinobacteria.c\_\_Actinobacteria.o\_\_Actinomycetales.f\_\_Microbacteriaceae.g\_\_Microbacterium  
k\_\_Bacteria.p\_\_Actinobacteria.c\_\_Actinobacteria.o\_\_Actinomycetales.f\_\_Microbacteriaceae.g\_\_Mycetocola  
k\_\_Bacteria.p\_\_Actinobacteria.c\_\_Actinobacteria.o\_\_Actinomycetales.f\_\_Microbacteriaceae.unclassified  
k\_\_Bacteria.p\_\_Actinobacteria.c\_\_Actinobacteria.o\_\_Actinomycetales.f\_\_Micrococcaceae.g\_\_Kocuria  
k\_\_Bacteria.p\_\_Actinobacteria.c\_\_Actinobacteria.o\_\_Actinomycetales.f\_\_Micrococcaceae.g\_\_Micrococcus  
k\_\_Bacteria.p\_\_Actinobacteria.c\_\_Actinobacteria.o\_\_Actinomycetales.f\_\_Micrococcaceae.g\_\_Rothia  
k\_\_Bacteria.p\_\_Actinobacteria.c\_\_Actinobacteria.o\_\_Actinomycetales.f\_\_Micrococcaceae.unclassified  
k\_\_Bacteria.p\_\_Actinobacteria.c\_\_Actinobacteria.o\_\_Actinomycetales.f\_\_Micromonosporaceae.g\_\_Actinoplanes  
k\_\_Bacteria.p\_\_Actinobacteria.c\_\_Actinobacteria.o\_\_Actinomycetales.f\_\_Micromonosporaceae.unclassified  
k\_\_Bacteria.p\_\_Actinobacteria.c\_\_Actinobacteria.o\_\_Actinomycetales.f\_\_Nocardiaceae.g\_\_Rhodococcus  
k\_\_Bacteria.p\_\_Actinobacteria.c\_\_Actinobacteria.o\_\_Actinomycetales.f\_\_Nocardioidaceae.g\_\_Nocardioides  
k\_\_Bacteria.p\_\_Actinobacteria.c\_\_Actinobacteria.o\_\_Actinomycetales.f\_\_Nocardioidaceae.unclassified  
k\_\_Bacteria.p\_\_Actinobacteria.c\_\_Actinobacteria.o\_\_Actinomycetales.f\_\_Propionibacteriaceae.g\_\_Propionibacterium  
k\_\_Bacteria.p\_\_Actinobacteria.c\_\_Actinobacteria.o\_\_Actinomycetales.f\_\_Pseudonocardiaceae.g\_\_Pseudonocardia  
k\_\_Bacteria.p\_\_Actinobacteria.c\_\_Actinobacteria.o\_\_Actinomycetales.f\_\_Pseudonocardiaceae.unclassified  
k\_\_Bacteria.p\_\_Actinobacteria.c\_\_Actinobacteria.o\_\_Actinomycetales.f\_\_Streptomycetaceae.g\_\_Streptomyces  
k\_\_Bacteria.p\_\_Actinobacteria.c\_\_Actinobacteria.o\_\_Actinomycetales.f\_\_Williamsiaceae.g\_\_Williamsia  
k\_\_Bacteria.p\_\_Actinobacteria.c\_\_Actinobacteria.o\_\_Actinomycetales.unclassified.unclassified  
k\_\_Bacteria.p\_\_Actinobacteria.c\_\_Actinobacteria.o\_\_Bifidobacteriales.f\_\_Bifidobacteriaceae.g\_\_Bifidobacterium  
k\_\_Bacteria.p\_\_Actinobacteria.c\_\_Coriobacteriia.o\_\_Coriobacteriales.f\_\_Coriobacteriaceae.g\_\_Atopobium  
k\_\_Bacteria.p\_\_Actinobacteria.c\_\_Coriobacteriia.o\_\_Coriobacteriales.f\_\_Coriobacteriaceae.g\_\_Collinsella  
k\_\_Bacteria.p\_\_Actinobacteria.c\_\_Coriobacteriia.o\_\_Coriobacteriales.f\_\_Coriobacteriaceae.unclassified  
k\_\_Bacteria.p\_\_Actinobacteria.c\_\_Thermoleophilia.o\_\_Solirubrobacterales.f\_\_Solirubrobacteraceae.unclassified

k\_\_Bacteria.p\_\_Actinobacteria.c\_\_Thermoleophilia.o\_\_Solirubrobacterales.unclassified.unclassified  
k\_\_Bacteria.p\_\_Firmicutes.c\_\_Bacilli.o\_\_Bacillales.f\_\_Bacillaceae.g\_\_Bacillus  
k\_\_Bacteria.p\_\_Firmicutes.c\_\_Bacilli.o\_\_Bacillales.f\_\_Bacillaceae.g\_\_Geobacillus  
k\_\_Bacteria.p\_\_Firmicutes.c\_\_Bacilli.o\_\_Bacillales.f\_\_Bacillaceae.g\_\_Natronobacillus  
k\_\_Bacteria.p\_\_Firmicutes.c\_\_Bacilli.o\_\_Bacillales.f\_\_Bacillaceae.unclassified  
k\_\_Bacteria.p\_\_Firmicutes.c\_\_Bacilli.o\_\_Bacillales.f\_\_Exiguobacteraceae.g\_\_Exiguobacterium  
k\_\_Bacteria.p\_\_Firmicutes.c\_\_Bacilli.o\_\_Bacillales.f\_\_Listeriaceae.g\_\_Brochothrix  
k\_\_Bacteria.p\_\_Firmicutes.c\_\_Bacilli.o\_\_Bacillales.f\_\_Planococcaceae.unclassified  
k\_\_Bacteria.p\_\_Firmicutes.c\_\_Bacilli.o\_\_Bacillales.f\_\_Staphylococcaceae.g\_\_Staphylococcus  
k\_\_Bacteria.p\_\_Firmicutes.c\_\_Bacilli.o\_\_Bacillales.f\_\_Thermicanaceae.g\_\_Thermicanus  
k\_\_Bacteria.p\_\_Firmicutes.c\_\_Bacilli.o\_\_Bacillales.unclassified.unclassified  
k\_\_Bacteria.p\_\_Firmicutes.c\_\_Bacilli.o\_\_Gemellales.f\_\_Gemellaceae.g\_\_Gemella  
k\_\_Bacteria.p\_\_Firmicutes.c\_\_Bacilli.o\_\_Lactobacillales.f\_\_Aerococcaceae.g\_\_Abiotrophia  
k\_\_Bacteria.p\_\_Firmicutes.c\_\_Bacilli.o\_\_Lactobacillales.f\_\_Aerococcaceae.g\_\_Facklamia  
k\_\_Bacteria.p\_\_Firmicutes.c\_\_Bacilli.o\_\_Lactobacillales.f\_\_Aerococcaceae.unclassified  
k\_\_Bacteria.p\_\_Firmicutes.c\_\_Bacilli.o\_\_Lactobacillales.f\_\_Carnobacteriaceae.g\_\_Carnobacterium  
k\_\_Bacteria.p\_\_Firmicutes.c\_\_Bacilli.o\_\_Lactobacillales.f\_\_Carnobacteriaceae.unclassified  
k\_\_Bacteria.p\_\_Firmicutes.c\_\_Bacilli.o\_\_Lactobacillales.f\_\_Enterococcaceae.g\_\_Enterococcus  
k\_\_Bacteria.p\_\_Firmicutes.c\_\_Bacilli.o\_\_Lactobacillales.f\_\_Enterococcaceae.unclassified  
k\_\_Bacteria.p\_\_Firmicutes.c\_\_Bacilli.o\_\_Lactobacillales.f\_\_Lactobacillaceae.g\_\_Lactobacillus  
k\_\_Bacteria.p\_\_Firmicutes.c\_\_Bacilli.o\_\_Lactobacillales.f\_\_Leuconostocaceae.g\_\_Leuconostoc  
k\_\_Bacteria.p\_\_Firmicutes.c\_\_Bacilli.o\_\_Lactobacillales.f\_\_Streptococcaceae.g\_\_Lactococcus  
k\_\_Bacteria.p\_\_Firmicutes.c\_\_Bacilli.o\_\_Lactobacillales.f\_\_Streptococcaceae.g\_\_Streptococcus  
k\_\_Bacteria.p\_\_Firmicutes.c\_\_Bacilli.o\_\_Lactobacillales.unclassified.unclassified  
k\_\_Bacteria.p\_\_Firmicutes.c\_\_Clostridia.o\_\_Clostridiales.f\_\_Clostridiaceae.g\_\_Clostridium  
k\_\_Bacteria.p\_\_Firmicutes.c\_\_Clostridia.o\_\_Clostridiales.f\_\_Lachnospiraceae.g\_\_Blautia  
k\_\_Bacteria.p\_\_Firmicutes.c\_\_Clostridia.o\_\_Clostridiales.f\_\_Lachnospiraceae.g\_\_Coprococcus  
k\_\_Bacteria.p\_\_Firmicutes.c\_\_Clostridia.o\_\_Clostridiales.f\_\_Lachnospiraceae.g\_\_Dorea  
k\_\_Bacteria.p\_\_Firmicutes.c\_\_Clostridia.o\_\_Clostridiales.f\_\_Lachnospiraceae.g\_\_Moryella  
k\_\_Bacteria.p\_\_Firmicutes.c\_\_Clostridia.o\_\_Clostridiales.f\_\_Lachnospiraceae.g\_\_Oribacterium  
k\_\_Bacteria.p\_\_Firmicutes.c\_\_Clostridia.o\_\_Clostridiales.f\_\_Lachnospiraceae.g\_\_Ruminococcus  
k\_\_Bacteria.p\_\_Firmicutes.c\_\_Clostridia.o\_\_Clostridiales.f\_\_Lachnospiraceae.g\_\_Shuttleworthia  
k\_\_Bacteria.p\_\_Firmicutes.c\_\_Clostridia.o\_\_Clostridiales.f\_\_Mogibacteriaceae.g\_\_Mogibacterium  
k\_\_Bacteria.p\_\_Firmicutes.c\_\_Clostridia.o\_\_Clostridiales.f\_\_Mogibacteriaceae.unclassified  
k\_\_Bacteria.p\_\_Firmicutes.c\_\_Clostridia.o\_\_Clostridiales.f\_\_Peptococcaceae.g\_\_Peptococcus  
k\_\_Bacteria.p\_\_Firmicutes.c\_\_Clostridia.o\_\_Clostridiales.f\_\_Peptostreptococcaceae.g\_\_Filifactor  
k\_\_Bacteria.p\_\_Firmicutes.c\_\_Clostridia.o\_\_Clostridiales.f\_\_Peptostreptococcaceae.g\_\_Peptostreptococcus  
k\_\_Bacteria.p\_\_Firmicutes.c\_\_Clostridia.o\_\_Clostridiales.f\_\_Peptostreptococcaceae.unclassified

k\_\_Bacteria.p\_\_Firmicutes.c\_\_Clostridia.o\_\_Clostridiales.f\_\_Ruminococcaceae.g\_\_Faecalibacterium  
k\_\_Bacteria.p\_\_Firmicutes.c\_\_Clostridia.o\_\_Clostridiales.f\_\_Ruminococcaceae.g\_\_Oscillospira  
k\_\_Bacteria.p\_\_Firmicutes.c\_\_Clostridia.o\_\_Clostridiales.f\_\_Ruminococcaceae.g\_\_Ruminococcus  
k\_\_Bacteria.p\_\_Firmicutes.c\_\_Clostridia.o\_\_Clostridiales.f\_\_Ruminococcaceae.unclassified  
k\_\_Bacteria.p\_\_Firmicutes.c\_\_Clostridia.o\_\_Clostridiales.f\_\_Tissierellaceae.g\_\_Anaerococcus  
k\_\_Bacteria.p\_\_Firmicutes.c\_\_Clostridia.o\_\_Clostridiales.f\_\_Tissierellaceae.g\_\_Finegoldia  
k\_\_Bacteria.p\_\_Firmicutes.c\_\_Clostridia.o\_\_Clostridiales.f\_\_Tissierellaceae.g\_\_Parvimonas  
k\_\_Bacteria.p\_\_Firmicutes.c\_\_Clostridia.o\_\_Clostridiales.f\_\_Tissierellaceae.g\_\_Peptoniphilus  
k\_\_Bacteria.p\_\_Firmicutes.c\_\_Clostridia.o\_\_Clostridiales.f\_\_Tissierellaceae.g\_\_Tepidimicrobium  
k\_\_Bacteria.p\_\_Firmicutes.c\_\_Erysipelotrichi.o\_\_Erysipelotrichales.f\_\_Erysipelotrichaceae.g\_\_Bulleidia  
k\_\_Bacteria.p\_\_Firmicutes.c\_\_Erysipelotrichi.o\_\_Erysipelotrichales.f\_\_Erysipelotrichaceae.g\_\_Erysipelothrix  
k\_\_Bacteria.p\_\_Firmicutes.c\_\_Erysipelotrichi.o\_\_Erysipelotrichales.f\_\_Erysipelotrichaceae.g\_\_Eubacterium  
k\_\_Bacteria.p\_\_Firmicutes.c\_\_Erysipelotrichi.o\_\_Erysipelotrichales.f\_\_Erysipelotrichaceae.unclassified

**Not classifiable**

k\_\_Bacteria.p\_\_Tenericutes.c\_\_Mollicutes.o\_\_Mycoplasmatales.f\_\_Mycoplasmataceae.g\_\_Mycoplasma  
k\_\_Bacteria.p\_\_Tenericutes.c\_\_Mollicutes.o\_\_RF39.unclassified.unclassified  
k\_\_Bacteria.p\_\_Thermi.c\_\_Deinococci.o\_\_Deinococcales.f\_\_Deinococcaceae.g\_\_Deinococcus  
k\_\_Bacteria.p\_\_Thermi.c\_\_Deinococci.o\_\_Thermales.f\_\_Thermaceae.g\_\_Thermus  
k\_\_Bacteria.p\_\_Actinobacteria.c\_\_Actinobacteria.o\_\_Actinomycetales.f\_\_Microbacteriaceae.g\_\_Candidatus\_Rhodoluna  
k\_\_Bacteria.p\_\_Firmicutes.c\_\_Bacilli.o\_\_Lactobacillales.f\_\_Carnobacteriaceae.g\_\_Granulicatella  
k\_\_Bacteria.p\_\_Firmicutes.c\_\_Clostridia.o\_\_Clostridiales.f\_\_Lachnospiraceae.g\_\_Anaerostipes  
k\_\_Bacteria.p\_\_Firmicutes.c\_\_Clostridia.o\_\_Clostridiales.f\_\_Lachnospiraceae.g\_\_Butyrivibrio  
k\_\_Bacteria.p\_\_Firmicutes.c\_\_Clostridia.o\_\_Clostridiales.f\_\_Lachnospiraceae.unclassified



Supplementary Table 2. Final reduced multivariable linear regression models\* of factors associated with relative abundance of certain phyla.

|                                          | <i>beta</i> | <i>p-value</i> |
|------------------------------------------|-------------|----------------|
| <i>Dependent variable: Bacteroidetes</i> |             |                |
| BE (vs. controls)                        | -0.02       | 0.68           |
| WHR                                      | -0.62       | 0.06           |
| PPI use                                  | -0.09       | 0.20           |

|                                       | <i>beta</i> | <i>p-value</i> |
|---------------------------------------|-------------|----------------|
| <i>Dependent variable: Firmicutes</i> |             |                |
| HGD/EAC (vs. NDBE/LGD)                | -0.18       | 0.03           |
| Fiber intake (grams)                  | 0.01        | 0.14           |

|                                           |       |      |
|-------------------------------------------|-------|------|
| <i>Dependent variable: Proteobacteria</i> |       |      |
| HGD/EAC (vs. NDBE/LGD)                    | 0.17  | 0.01 |
| Fiber intake (grams)                      | -0.01 | 0.04 |

|                                               |        |      |
|-----------------------------------------------|--------|------|
| <i>Dependent variable: Enterobacteriaceae</i> |        |      |
| HGD/EAC (vs. NDBE/LGD)                        | 0.10   | 0.02 |
| Fat intake (% of calories)                    | -0.004 | 0.44 |
| Ever smoking history                          | 0.02   | 0.64 |

\* Full models were created including all covariates with a univariate p-value <0.10. Variables with the highest p-value and >0.15 were then sequentially removed to generate a final reduced model. For *Enterobacteriaceae*, neither fat intake nor ever smoking history were retained in the final model. The above is shown to reflect that HGD/EAC remained significantly associated with relative abundance of *Enterobacteriaceae* even after adjusting for potential confounders.

| <b>Supplementary Table 3.</b> Differentially abundant taxa and LDA effect size comparing patients with BE and controls, based on LEfSe analyses. |         |            |          |
|--------------------------------------------------------------------------------------------------------------------------------------------------|---------|------------|----------|
|                                                                                                                                                  |         | <i>LDA</i> | <i>p</i> |
| Bacteria.Proteobacteria.Alphaproteobacteria.Sphingomonadales                                                                                     | BE      | 2.23692    | 0.014539 |
| Bacteria.Proteobacteria.Alphaproteobacteria.Sphingomonadales.Sphingomonadaceae                                                                   | BE      | 2.243565   | 0.014539 |
| Bacteria.Proteobacteria.Alphaproteobacteria.Sphingomonadales.Sphingomonadaceae.Sphingomonas                                                      | BE      | 2.150024   | 0.035289 |
| Bacteria.Proteobacteria.Epsilonproteobacteria.Campylobacteriales.Campylobacteraceae.Campylobacter.unclassified                                   | BE      | 2.984646   | 0.032354 |
| Bacteria.Bacteroidetes.Bacteroidia.Bacteroidales.                                                                                                | control | 2.614692   | 0.009705 |
| Bacteria.Bacteroidetes.Bacteroidia.Bacteroidales..                                                                                               | control | 2.609976   | 0.009705 |
| Bacteria.Bacteroidetes.Bacteroidia.Bacteroidales...                                                                                              | control | 2.615052   | 0.009705 |
| Bacteria.Bacteroidetes.Bacteroidia.Bacteroidales.Paraprevotellaceae                                                                              | control | 4.312204   | 0.005142 |
| Bacteria.Bacteroidetes.Bacteroidia.Bacteroidales.Paraprevotellaceae.Preotella                                                                    | control | 4.312148   | 0.005142 |
| Bacteria.Bacteroidetes.Bacteroidia.Bacteroidales.Paraprevotellaceae.Preotella.                                                                   | control | 4.201969   | 0.009099 |
| Bacteria.Bacteroidetes.Bacteroidia.Bacteroidales.Porphyromonadaceae.Porphyromonas.endodontalis                                                   | control | 3.333554   | 0.034681 |
| Bacteria.Bacteroidetes.Bacteroidia.Bacteroidales.Porphyromonadaceae.unclassified                                                                 | control | 2.521977   | 0.017077 |
| Bacteria.Bacteroidetes.Bacteroidia.Bacteroidales.Porphyromonadaceae.unclassified.unclassified                                                    | control | 2.432255   | 0.017077 |
| Bacteria.Bacteroidetes.Bacteroidia.Bacteroidales.Prevoellaceae.Preotella.nigrescens                                                              | control | 3.15784    | 0.028961 |
| Bacteria.Bacteroidetes.Bacteroidia.Bacteroidales.Prevoellaceae.Preotella.pallens                                                                 | control | 3.742235   | 0.042393 |
| Bacteria.Firmicutes.Clostridia.Clostridiales.Acidaminobacteraceae                                                                                | control | 2.16548    | 0.018881 |
| Bacteria.Firmicutes.Clostridia.Clostridiales.Acidaminobacteraceae.                                                                               | control | 2.177647   | 0.018881 |
| Bacteria.Firmicutes.Clostridia.Clostridiales.Acidaminobacteraceae..                                                                              | control | 2.123622   | 0.018881 |
| Bacteria.Firmicutes.Clostridia.Clostridiales.Lachnospiraceae.Butyrvibrio                                                                         | control | 2.331043   | 0.035148 |
| Bacteria.Firmicutes.Clostridia.Clostridiales.Lachnospiraceae.Butyrvibrio.                                                                        | control | 2.319944   | 0.035148 |
| Bacteria.Firmicutes.Clostridia.Clostridiales.Peptostreptococcaceae.                                                                              | control | 2.487278   | 0.014097 |
| Bacteria.Firmicutes.Clostridia.Clostridiales.Peptostreptococcaceae..                                                                             | control | 2.513842   | 0.014097 |
| Bacteria.Firmicutes.Clostridia.Clostridiales.Peptostreptococcaceae.Filifactor                                                                    | control | 2.551454   | 0.009954 |
| Bacteria.Firmicutes.Clostridia.Clostridiales.Peptostreptococcaceae.Filifactor.                                                                   | control | 2.547126   | 0.009954 |
| Bacteria.Proteobacteria.Betaproteobacteria.Burkholderiales                                                                                       | control | 2.737606   | 0.025721 |
| Bacteria.Proteobacteria.Betaproteobacteria.Burkholderiales.Burkholderiaceae                                                                      | control | 2.812232   | 0.009538 |
| Bacteria.Proteobacteria.Betaproteobacteria.Burkholderiales.Burkholderiaceae.Lautropia                                                            | control | 2.812232   | 0.009538 |
| Bacteria.Proteobacteria.Betaproteobacteria.Burkholderiales.Burkholderiaceae.Lautropia.                                                           | control | 2.812232   | 0.009538 |

|                                                                                                   |         |          |          |
|---------------------------------------------------------------------------------------------------|---------|----------|----------|
| Bacteria.Proteobacteria.Gammaproteobacteria.Pasteurellales.Pasteurellaceae.Aggregatibacter        | control | 3.609401 | 0.026449 |
| Bacteria.Proteobacteria.Gammaproteobacteria.Pasteurellales.Pasteurellaceae.Aggregatibacter.segnis | control | 2.833369 | 0.041345 |
| Bacteria.Proteobacteria.Gammaproteobacteria.Pseudomonadales.Moraxellaceae.Enhydrobacter           | control | 2.455294 | 0.005343 |
| Bacteria.Proteobacteria.Gammaproteobacteria.Pseudomonadales.Moraxellaceae.Enhydrobacter.          | control | 2.532823 | 0.017077 |
| Bacteria.Spirochaetes.Spirochaetes.Spirochaetales.Spirochaetaceae.Treponema.                      | control | 2.775355 | 0.047008 |
| Bacteria.Spirochaetes.Spirochaetes.Spirochaetales.Spirochaetaceae.Treponema.unclassified          | control | 2.13242  | 0.012117 |
| Bacteria.Synergistetes                                                                            | control | 2.640222 | 0.022385 |
| Bacteria.Synergistetes.Synergistia                                                                | control | 2.638266 | 0.022385 |
| Bacteria.Synergistetes.Synergistia.Synergistales                                                  | control | 2.635565 | 0.022385 |
| Bacteria.Synergistetes.Synergistia.Synergistales.Dethiosulfovibrionaceae                          | control | 2.637959 | 0.022385 |
| Bacteria.Synergistetes.Synergistia.Synergistales.Dethiosulfovibrionaceae.TG5                      | control | 2.637354 | 0.022385 |
| Bacteria.Synergistetes.Synergistia.Synergistales.Dethiosulfovibrionaceae.TG5.                     | control | 2.645503 | 0.022385 |
